# Supplementary material
Source: Springer Nature journal article supplement (https://www.springermedizin.de/resource/supplementary/12889_2008_1264_MOESM1_ESM.pdf/9502818)
Supplement: MOESM1 [file 9502818]

## Collection of MSC stories from participants

### 3 groups in Manipur - 33 stories

Participant panel\* convenes

NGO panel\*\* convenes

4 MSC stories selected

4 MSC stories selected

Rationale for selection documented

Rationale for selection documented

### 3 groups in Nagaland – 22 stories

Participant panel\* convenes

NGO panel\*\* convenes

4 MSC stories selected

4 MSC stories selected

Rationale for selection documented

Rationale for selection documented

\*Participant panels consisted of 2 peer facilitators, 2 participants and 1 NGO liaison worker from each group i.e. 15 people all together

\*\*NGO panels consisted of 2 senior staff from partnering NGOs i.e. 8 people all together
